# Supplementary material for: Osteoglycin inhibition by microRNA miR-155 impairs myogenesis
Source: PLOS journal article supplement (doi:10.1371/journal.pone.0188464), 2017-11-21

# Supporting Data

**S2 Fig.**  
**Experimental design and lipofectamine treatment**

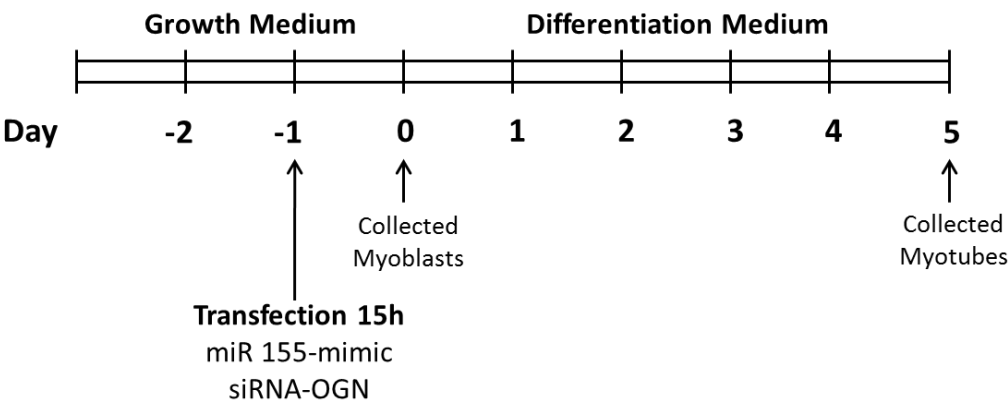

Supplement: S2 (10.1371/journal.pone.0188464.s002) [file journal.pone.0188464.s002]
